# Supplementary material for: Unveiling teachers’ beliefs on visual cognition and learning styles of deaf and hard of hearing students: A Portuguese-Swedish study
Source: PLoS One. 2022 Feb 15;17(2):e0263216. doi: 10.1371/journal.pone.0263216 (PMC9116990; doi:10.1371/journal.pone.0263216)
Supplement: S1 File — (PDF) [file pone.0263216.s012.pdf]

# Concepções e práticas de professores e educadores de infância acerca dos estilos de aprendizagem dos alunos surdos

Prezado(a) Professor(a)/ Educador(a):

O presente questionário enquadra-se no âmbito de um programa doutoral desenvolvido na área de Educação para Surdos, realizado no Instituto de Ciências da Saúde (ICS), Universidade Católica Portuguesa em parceria com a Universidade de Estocolmo. Neste sentido, pedimos a sua colaboração para o preenchimento do documento apresentado. Importa referir que o questionário é anónimo e os dados serão utilizados apenas no âmbito da investigação em questão.

Para responder a este questionário por favor considere apenas as crianças ou alunos com surdez e sem outras patologias ou perturbações sensoriais ou cognitivas, a frequentar o ensino obrigatório.

## Perfil do inquirido

### 1. 1. Idade

*Marcar apenas uma oval.*

- ☐ entre 25 e 35 anos
- ☐ entre 36 e 45 anos
- ☐ entre 46 e 55 anos
- ☐ entre 56 e 65 anos
- ☐ outro

## 2. 2. Habilitações académicas

*Marcar apenas uma oval.*

- ☐ Licenciatura
- ☐ Pós-graduação / especialização
- ☐ Mestrado
- ☐ Doutoramento
- ☐ Outra

## 3. 3. País - Portugal (zona onde trabalha)

*Marcar apenas uma oval.*

- ☐ Norte
- ☐ Centro
- ☐ Sul

## 4. 4. Consulta habitualmente literatura científica nas áreas da Educação, Surdez ou das Neurociências?

*Marcar apenas uma oval.*

- ☐ sim
- ☐ não
- ☐ não respondo

## 5. 5. Em que contexto leciona ou já lecionou/ presta ou prestou apoio pedagógico a alunos surdos

*Marcar apenas uma oval.*

- ☐ Contexto Português - num Agrupamento/ Escola de Referência para Ensino Bilingue de Alunos Surdos (EREBAS)
- ☐ Contexto Português - num Agrupamento sem Ensino Bilingue de Alunos Surdos
- ☐ Outra

## 6. 6. Cargo que ocupa /ocupou no Agrupamento

*Marcar apenas uma oval.*

- ☐ Educador(a) Creche
- ☐ Educador(a)(Pré-escolar-JI)
- ☐ Professor(a) do 1º ciclo
- ☐ Professor do 2º ciclo
- ☐ Professor(a) do 3º ciclo
- ☐ Professor(a) do ensino secundário
- ☐ Docente de Educação Especial (grupo 920)
- ☐ Docente de Língua Gestual

## 7. 7. Organização da turma na qual leciona ou presta apoio (ex: turma de surdos ou turma de surdos integrados)

---

## 8. 8. Perfil auditivo - que opção o/a caracteriza melhor ?

*Marcar apenas uma oval.*

- ☐ Pessoa Surda
- ☐ Pessoa com Surdez
- ☐ Ouvinte
- ☐ Não respondo

## 9. 9. Com que idade aprendeu Língua Gestual Portuguesa?

---

10. 10. Utiliza a Língua Gestual Portuguesa ou Português gestualizado com os alunos a quem leciona?

*Marcar apenas uma oval.*

☐ Sim

☐ Não

11. 11. Experiência de ensino com alunos surdos

*Marcar apenas uma oval.*

☐ até 5 anos

☐ entre 5 e 10 anos

☐ entre 10 a 20 anos

☐ mais de 20 anos

12. 12. No grupo de crianças/ alunos surdos a que leciona /leccionou, a maioria normalmente...

*Marcar apenas uma oval.*

☐ Compreendem e expressam ideias através da oralidade

☐ Compreendem e expressam ideias através da LGP

☐ Compreendem e expressam ideias usando quer a oralidade quer a LGP

13. 13. Na sua opinião, em que nível se encontram (ou encontravam) os alunos em Língua Portuguesa quando comparados com os pares ouvintes?

*Marcar apenas uma oval.*

☐ Acima do nível de performance

☐ No mesmo nível de performance

☐ Abaixo do nível de escolaridade ( $\pm$  1 ano)

☐ Abaixo do nível de escolaridade (+ de 2 anos)

## 14. 14. E em Matemática?

*Marcar apenas uma oval.*

- ☐ Acima do nível de performance
- ☐ No mesmo nível de performance
- ☐ Abaixo do nível de escolaridade ( $\pm$  1 ano)
- ☐ Abaixo do nível de escolaridade (+ de 2 anos)

Segunda secção / sektion 2 ESTILOS DE APRENDIZAGEM – Responda de acordo com a sua opinião pessoal

15. 15. De acordo com a sua concepção, comparativamente aos alunos ouvintes na mesma faixa etária, é provável que as crianças/ os alunos surdos possuam melhores capacidades ao nível Visual (ex.: perceção visual, atenção visual e memória visual)?

*Marcar apenas uma oval.*

- ☐ sim
- ☐ não
- ☐ não sei
- ☐ depende (se considera que a existência destas capacidades visuais depende de algum fator em particular, por favor explicita qual a seguir

16. 15.1. Considero que depende de factores como:

---

---

---

---

---

17. 16. Este ganho de visualidade nas crianças com surdez poderá ser manifestado...

*Marcar apenas uma oval.*

- ☐ Entre os 0 e 6 anos de idade
- ☐ Entre os 6 e os 10 anos de idade
- ☐ Entre os 10 e 18 anos de idade
- ☐ A partir dos 18/anos de idade
- ☐ Não sei

18. 17. Por serem “aprendentes visuais”, beneficiam se as estratégias de ensino forem mais baseadas em imagens e em pistas visuais.

*Marcar apenas uma oval.*

|                        | 1                     | 2                     | 3                     | 4                     | 5                     |                        |
|------------------------|-----------------------|-----------------------|-----------------------|-----------------------|-----------------------|------------------------|
| discordo completamente | <input type="radio"/> | concordo completamente |

19. 18. A exposição de um conjunto diversificado de imagens nas paredes da sala de aula de 1º ciclo ou JI onde existem crianças/ alunos surdos, é importante para reforçar as suas aprendizagens.

*Marcar apenas uma oval.*

|                        | 1                     | 2                     | 3                     | 4                     | 5                     |                        |
|------------------------|-----------------------|-----------------------|-----------------------|-----------------------|-----------------------|------------------------|
| discordo completamente | <input type="radio"/> | concordo completamente |

20. 19. As imagens que são mediadas pela ação do/a professor/a têm uma influência superior nas aprendizagens dos alunos surdos do que as imagens apresentadas de forma menos dinâmica?

*Marcar apenas uma oval.*

|                        | 1                     | 2                     | 3                     | 4                     | 5                     |                        |
|------------------------|-----------------------|-----------------------|-----------------------|-----------------------|-----------------------|------------------------|
| discordo completamente | <input type="radio"/> | concordo completamente |

21. 20. Na sua opinião, as crianças/ os alunos surdos têm mais dificuldades em manter a atenção visual do que os seus pares ouvintes.

*Marcar apenas uma oval.*

|                        | 1                     | 2                     | 3                     | 4                     | 5                     |                        |
|------------------------|-----------------------|-----------------------|-----------------------|-----------------------|-----------------------|------------------------|
| discordo completamente | <input type="radio"/> | concordo completamente |

22. 20.1 Por favor explique porquê

---

---

---

---

---

23. 21. Na sua opinião, a razão pela qual a criança / o aluno surdo possa descodificar melhor a informação quando esta é apresentada através de imagens, relaciona-se com a natureza visioespacial e cinética da língua gestual.

*Marcar apenas uma oval.*

|                        | 1                     | 2                     | 3                     | 4                     | 5                     |                        |
|------------------------|-----------------------|-----------------------|-----------------------|-----------------------|-----------------------|------------------------|
| discordo completamente | <input type="radio"/> | concordo completamente |

24. 22. Do conhecimento que tem sobre a pesquisa científica no campo da Educação para Surdos, quais os métodos considerados mais eficazes no processo de ensino e aprendizagem da leitura e escrita da língua portuguesa?

*Marcar apenas uma oval.*

- ☐ os métodos visuais que partem globalmente do texto/frases para as unidades mais pequenas- letra (Globais ou Analíticos)
- ☐ os métodos fonéticos que partem dos fonemas e grafemas para a palavra - frase- texto (Sintéticos)
- ☐ os métodos mistos (combinação de métodos Analíticos-Sintéticos)
- ☐ não sei
- ☐ outros

25. 22.1 Se respondeu «Outros», por favor explicita

---

---

---

---

---

26. 23. Na área da matemática, os conceitos devem ser complementados com algum tipo de suporte visual (esquemas, gráficos, diagramas, etc.), pois a informação dada nos enunciados verbais é insuficiente para o processo de raciocínio do aluno surdo.

*Marcar apenas uma oval.*

|                        | 1                     | 2                     | 3                     | 4                     | 5                     |                        |
|------------------------|-----------------------|-----------------------|-----------------------|-----------------------|-----------------------|------------------------|
| discordo completamente | <input type="radio"/> | concordo completamente |

27. 23.1 Por favor, explique o porquê da sua resposta anterior

---

---

---

---

---

Terceira secção - Neurociência e Educação / Por favor escolha entre as opções MITO, FACTO ou NÃO SEI

28. 24. Os alunos aprendem melhor quando recebem as informações no seu estilo de aprendizagem preferencial (ex.: estilo auditivo, visual, cinestésico).

*Marcar apenas uma oval.*

- ☐ Facto
- ☐ Mito
- ☐ Não sei

29. 25. Os alunos mostram preferências no modo em que recebem informações (ex.: auditivo, visual, cinestésico).

*Marcar apenas uma oval.*

- ☐ Facto
- ☐ Mito
- ☐ Não sei

30. 26. Os ambientes que são ricos em estímulos desenvolvem mais o cérebro da criança em idade pré-escolar.

*Marcar apenas uma oval.*

- ☐ Facto
- ☐ Mito
- ☐ Não sei

31. 27. Existem períodos críticos na infância a partir dos quais certas coisas deixam de poder ser aprendidas.

*Marcar apenas uma oval.*

- ☐ Facto
- ☐ Mito
- ☐ Não sei

32. 28. As crianças devem adquirir a sua língua materna antes de uma segunda língua ser aprendida. Caso contrário, nenhuma das línguas será totalmente adquirida.

*Marcar apenas uma oval.*

- ☐ Facto
- ☐ Mito
- ☐ Não sei

33. 29. Devido a uma maior dependência da informação visual para conhecer e interpretar o mundo, o aluno surdo deverá ter a oportunidade de, na escola, adquirir mais competências relacionadas com a eficácia da sua visualidade e literacia visual.

*Marcar apenas uma oval.*

- ☐ sim
- ☐ não
- ☐ não sei

34. 30. Sente-se confiante quanto à seleção de metodologias /estratégias pedagógicas e didáticas que aplica junto dos alunos surdos do seu grupo/turma? ( escolha um valor de 1 a 5).

*Marcar apenas uma oval.*

|                | 1                     | 2                     | 3                     | 4                     | 5                     |                      |
|----------------|-----------------------|-----------------------|-----------------------|-----------------------|-----------------------|----------------------|
| nada confiante | <input type="radio"/> | totalmente confiante |

35. 30.1 Gostaríamos que comentasse o porquê da sua resposta

---

---

---

---

---

36. 31. Se sente necessidade de atualizar o conhecimento científico-pedagógico acerca da Educação para Surdos, em qual das modalidades pensa que poderia, eventualmente, vir a participar?

*Marcar apenas uma oval.*

- ☐ Ação de formação na modalidade de ensino à distância
- ☐ Seminário/ workshop presencial
- ☐ Grupo de partilha /discussão com outros professores
- ☐ outra

Muito obrigados pela sua participação.

---

Este conteúdo não foi criado nem aprovado pela Google.

Google Formulários
